# Supplementary material for: Uranium incorporation in fluorite and exploration of U–Pb dating
Source: Copernicus journal article supplement (doi:10.5194/gchron-3-199-2021), 2021-04-19
Supplement: Supplementary file 1 [file gchron-3-199-2021-supplement.zip]

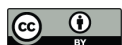

## *Supplement of*

# **Uranium incorporation in fluorite and exploration of U–Pb dating**

**Louise Lenoir et al.**

*Correspondence to:* Louise Lenoir ([louise.lenoir@universite-paris-saclay.fr](mailto:louise.lenoir@universite-paris-saclay.fr))

- [gchron-3-199-2021-supplement-title-page.pdf](#)
- [Suppdata-Lenoiretal.,2021.xlsx](#)

The copyright of individual parts of the supplement might differ from the article licence.
