# Supplementary material for: Uranium incorporation in fluorite and exploration of U–Pb dating
Source: Copernicus journal article supplement (doi:10.5194/gchron-3-199-2021), 2021-04-19
Supplement: Supplementary file 2 [file gchron-3-199-2021-supplement.zip]

Archive with 2 entries (2 files):
- gchron-3-199-2021-supplement-title-page.pdf
- Suppdata-Lenoiretal.,2021.xlsx
